# Supplementary material for: An overview of organic aerosols at an urban site in Hong Kong: insights from in-situ measurement of molecular markers
Source: Copernicus journal article supplement (doi:10.5194/egusphere-2023-1835), 2023-09-22
Supplement: Supplementary file 1 [file egusphere-2023-1835-supplement.pdf]

Supplement to the manuscript

An overview of organic aerosols at an urban site in Hong Kong: insights from in-situ measurement of molecular markers

Hongyong Li<sup>1,2</sup>, Xiaopu Lyu<sup>2\*</sup>, Likun Xue<sup>1\*</sup>, Yunxi Huo<sup>3</sup>, Dawen Yao<sup>3</sup>, Haoxian Lu<sup>4</sup>, Hai Guo<sup>3\*</sup>

<sup>1</sup>Environment Research Institute, Shandong University, Qingdao, China

<sup>2</sup>Department of Geography, Faculty of Social Sciences, Hong Kong Baptist University, Hong Kong

<sup>3</sup>Department of Civil and Environmental Engineering, The Hong Kong Polytechnic University, Hong Kong

<sup>4</sup>Marine Biological Resources Bank, Southern Marine Science and Engineering Guangdong Laboratory (Zhuhai), Guangdong, China

\* Correspondence to Xiaopu Lyu (xiaopu\_lyu@hkbu.edu.hk); Likun Xue (xuelikun@sdu.edu.cn); Hai Guo (hai.guo@polyu.edu.hk)

## Supplemental Figures

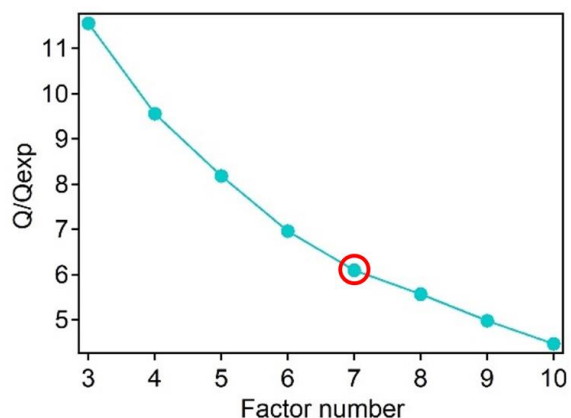

**Figure S1.** Change of  $Q/Q_{\text{exp}}$  ratio with the number of factors in PMF base runs. A seven-factor solution is adopted, as highlighted in red circle.

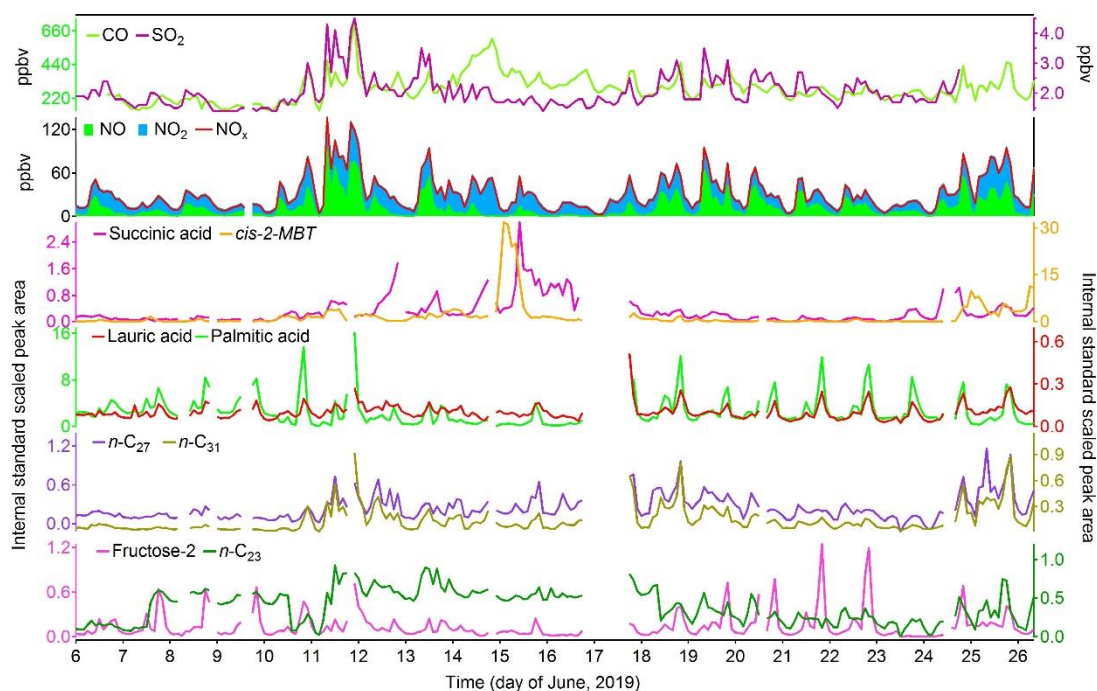

**Figure S2.** Time series of selected OA markers, CO, SO<sub>2</sub>, and NO-NO<sub>2</sub>-NO<sub>x</sub>. Variations of OA markers are represented by internal standard scaled peak areas. Missing data are due to instrument maintenance.

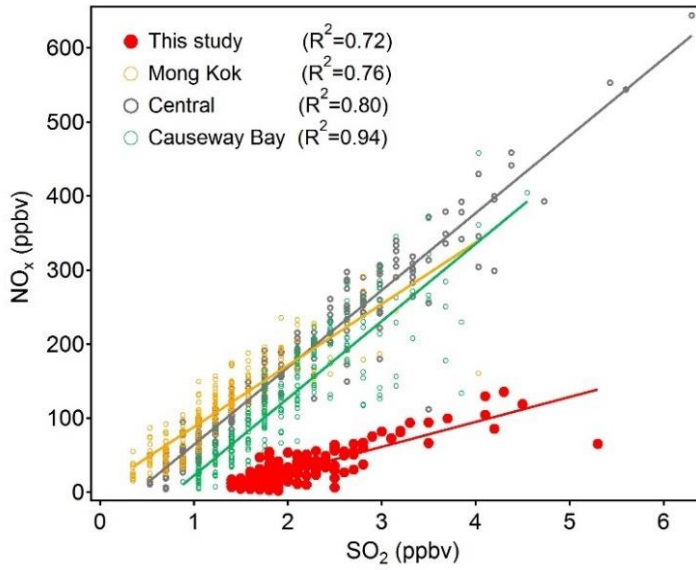

**Figure S3.** Correlations between  $\text{NO}_x$  and  $\text{SO}_2$  at this site and three roadside sites in Hong Kong in the study period.

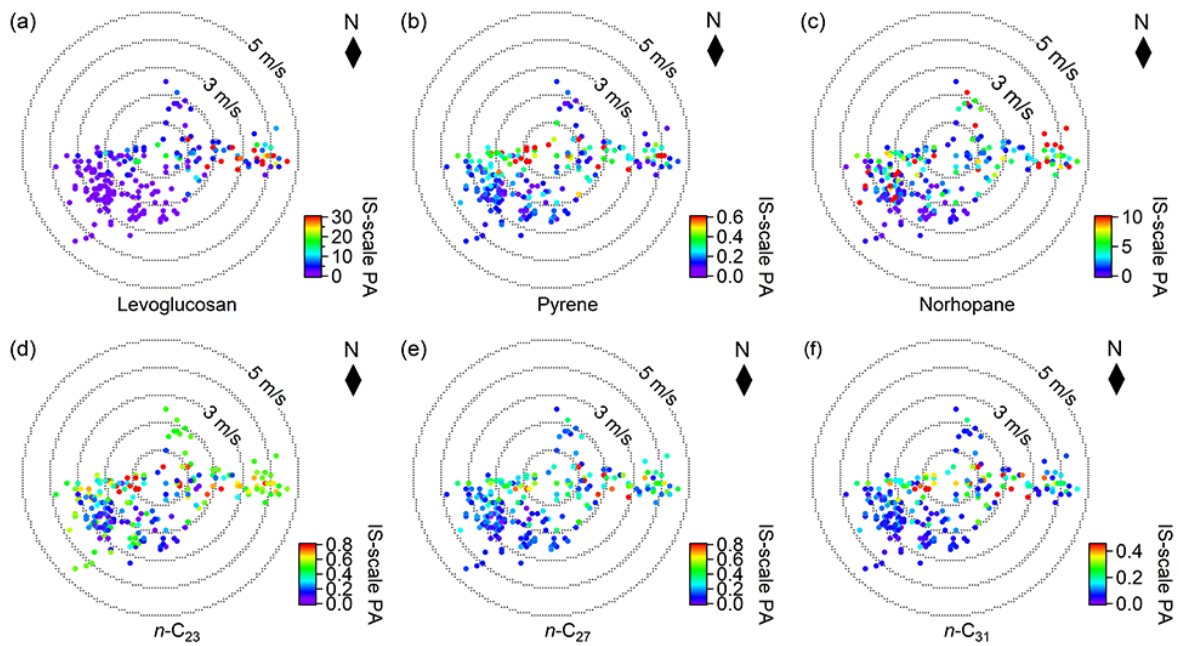

**Figure S4.** Wind roses colored by the IS-scaled PA of levoglucosan (a), pyrene (b), norhopane (c),  $n\text{-C}_{23}$  (d),  $n\text{-C}_{27}$  (e), and  $n\text{-C}_{31}$  (f).

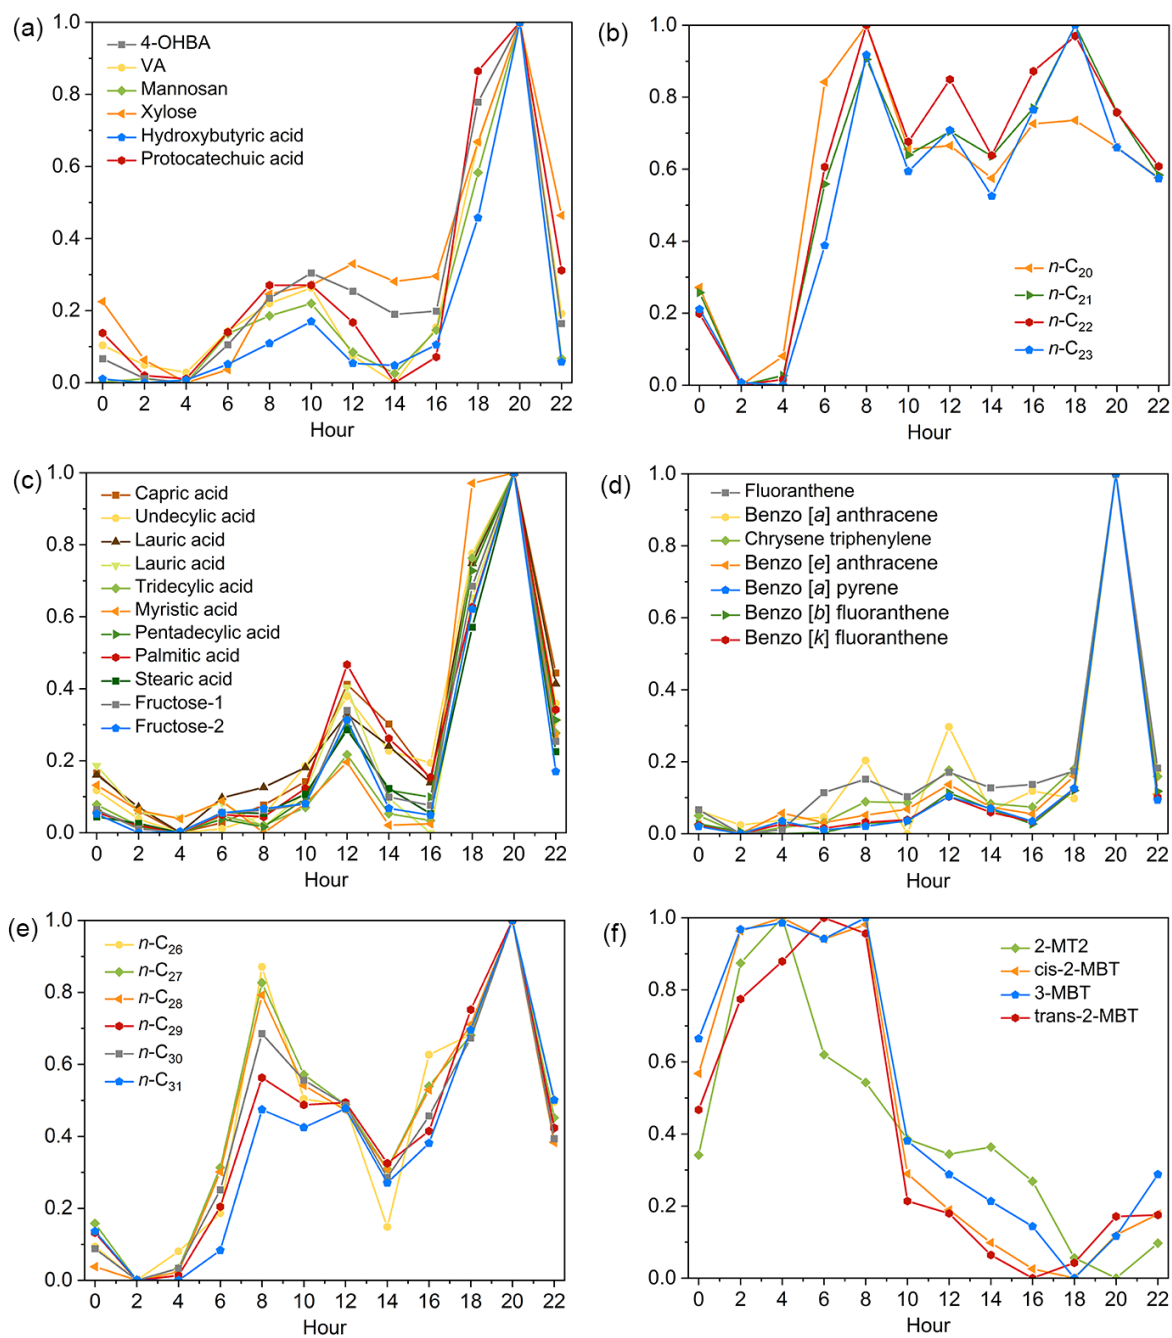

**Figure S5.** Diurnal patterns of selected OA markers represented by the normalized IS-scaled PA. The species are grouped based on the similarity in patterns.

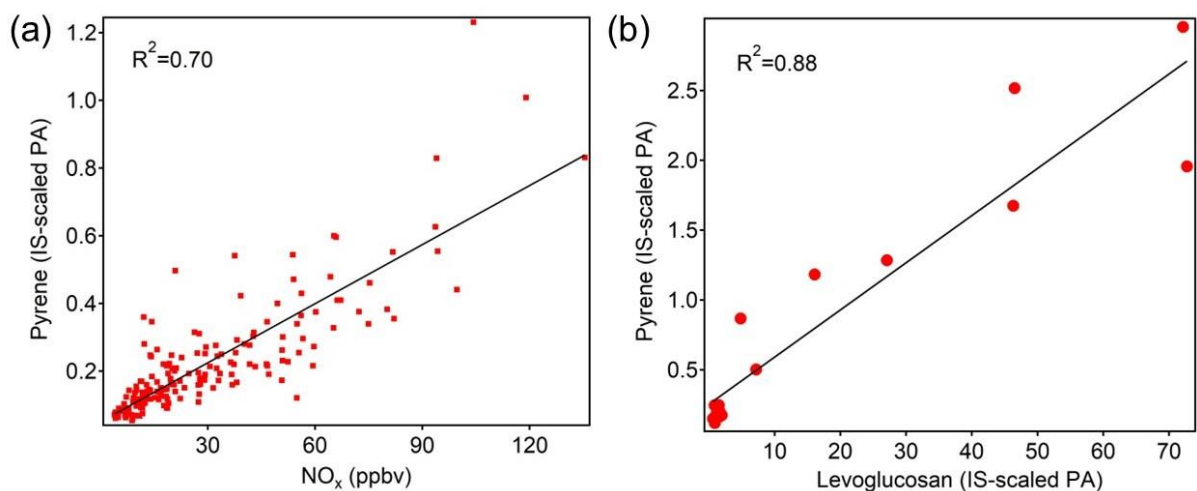

**Figure S6.** Correlations of pyrene (a representative of PAHs) vs. levoglucosan at 20:00 (a) and pyrene vs. NO<sub>x</sub> at other times excluding 14:00 – 16:00 (b).

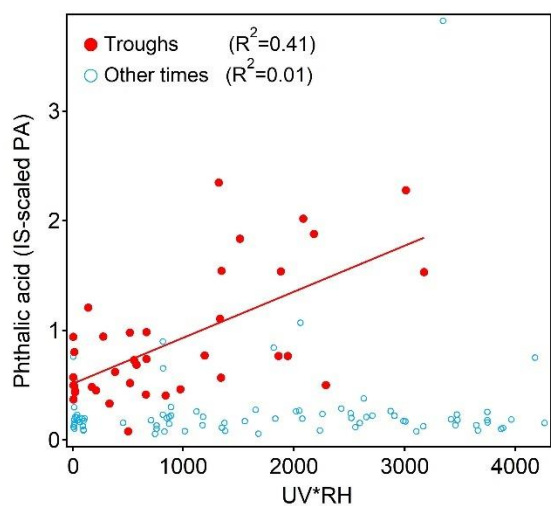

**Figure S7.** Correlations between phthalic acid and the product of UV and RH in presence of troughs and at other times with marine air.

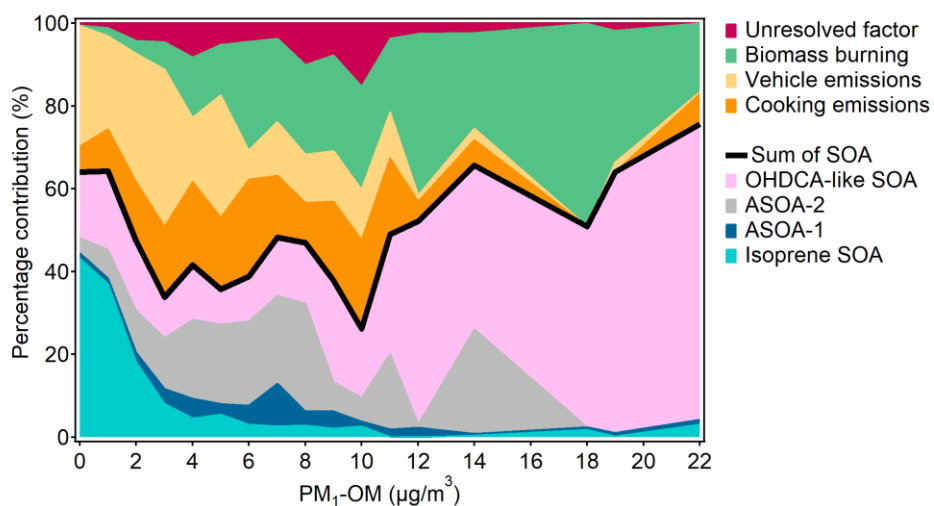

**Figure S8.** Changes of percentage contributions of individual OA sources to  $PM_{1-OM}$  with  $PM_{1-OM}$  concentration.

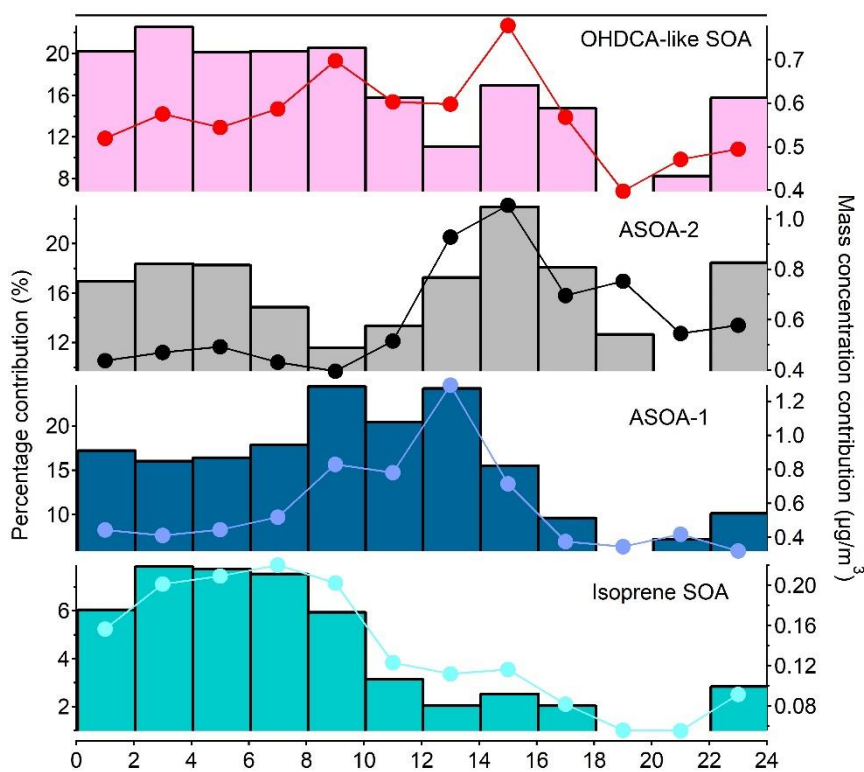

**Figure S9.** Average diurnal cycles of percentage contributions (columns) and mass concentration contributions (lines) to  $PM_{1-OM}$  of SOA factors.

## Supplemental Tables

**Table S1.** Instruments and working principles for real-time measurement of trace gases.

| Measurement species                 | Instrument                                                                           | Model      | Working principle        |
|-------------------------------------|--------------------------------------------------------------------------------------|------------|--------------------------|
| O <sub>3</sub>                      | Teledyne Advanced Pollution Instrumentation (API) O <sub>3</sub> Analyzer            | T400       | Ultraviolet absorption   |
| NO-NO <sub>2</sub> -NO <sub>x</sub> | Teledyne Advanced Pollution Instrumentation (API) NO/NO <sub>x</sub> Analyzer        | Model 200E | Chemiluminescence        |
| CO                                  | Teledyne Advanced Pollution Instrumentation (API) Gas Filter Correlation CO Analyzer | T300U      | Infrared absorption      |
| SO <sub>2</sub>                     | Teledyne Advanced Pollution Instrumentation (API) SO <sub>2</sub> Analyzer           | T100U      | Ultraviolet fluorescence |

**Table S2.** Base ion, retention time, and internal standard for specific OA compounds. Bold are the representative species that we focus on in this study.

| Sequence  | Compound name                                                           | Base ion (m/z) | Retention time (s) | Internal standard          |
|-----------|-------------------------------------------------------------------------|----------------|--------------------|----------------------------|
| <b>1</b>  | <b>2-methylglyceric acid (2-MGA)</b>                                    | <b>219</b>     | <b>426.1</b>       | <b>Pentaerythritol-13C</b> |
| <b>2</b>  | <b>2-methylerythritol (2-MT1)</b>                                       | <b>219</b>     | <b>495.9</b>       | <b>Pentaerythritol-13C</b> |
| 3         | 2-methylthreitol (2-MT2)                                                | 219            | 501.4              | Pentaerythritol-13C        |
| <b>4</b>  | <b><i>cis</i>-2-methyl-1,3,4-trihydroxy-1-butene (<i>cis</i>-2-MBT)</b> | <b>231</b>     | <b>442.5</b>       | <b>Pentaerythritol-13C</b> |
| 5         | 3-methyl-2,3,4-trihydroxy-1-butene (3-MBT)                              | 231            | 450.3              | Pentaerythritol-13C        |
| 6         | <i>trans</i> -2-methyl-1,3,4-trihydroxy-1-butene ( <i>trans</i> -2-MBT) | 231            | 452.2              | Pentaerythritol-13C        |
| 7         | 3-hydroxy-4,4-dimethylglutaric acid (HDMGA)                             | 377            | 517.1              | Pentaerythritol-13C        |
| <b>8</b>  | <b>2,3-dihydroxy-4-oxopentanoic acid (DHOPA)</b>                        | <b>321</b>     | <b>490.5</b>       | <b>Pentaerythritol-13C</b> |
| 9         | Tartaric acid isomer 1 (TA1)                                            | 292            | 510.0              | Pentaerythritol-13C        |
| <b>10</b> | <b>Tartaric acid isomer 2 (TA2)</b>                                     | <b>292</b>     | <b>523.5</b>       | <b>Pentaerythritol-13C</b> |
| <b>11</b> | <b>Malic acid (MA)</b>                                                  | <b>233</b>     | <b>481.1</b>       | <b>Pentaerythritol-13C</b> |
| 12        | Citramalic acid (CMA)                                                   | 247            | 477.4              | Pentaerythritol-13C        |
| 13        | 2-hydroxyglutaric acid (2-HGA)                                          | 349            | 505.1              | Pentaerythritol-13C        |

|           |                                                 |            |               |                            |
|-----------|-------------------------------------------------|------------|---------------|----------------------------|
| 14        | 2-hydroxydicarboxylic acid                      | 292        | 450.7         | Pentaerythritol-13C        |
| <b>15</b> | <b>Succinic acid</b>                            | <b>247</b> | <b>421.3</b>  | <b>Pentaerythritol-13C</b> |
| 16        | Fumaric acid                                    | 245        | 433.1         | Pentaerythritol-13C        |
| 17        | Glutaric acid                                   | 261        | 453.1         | D-adipic acid              |
| 18        | Pimelic acid                                    | 289        | 511.2         | D-adipic acid              |
| 19        | Adipic acid                                     | 111        | 484.4         | D-adipic acid              |
| 20        | Azelaic acid                                    | 317        | 558.7         | 1-Pentadecan-d31-ol        |
| 21        | Glyceric acid                                   | 292        | 430.0         | Pentaerythritol-13C        |
| 22        | Hydroxybutyric acid                             | 233        | 490.7         | Pentaerythritol-13C        |
| 23        | Mannose                                         | 204        | 585.6         | Pentaerythritol-13C        |
| 24        | Glucose                                         | 204        | 603.1         | Pentaerythritol-13C        |
| 25        | Fructose isomer-1 (Fructose-1)                  | 437        | 565.1         | Pentaerythritol-13C        |
| <b>26</b> | <b>Fructose isomer-2 (Fructose-2)</b>           | <b>437</b> | <b>566.9</b>  | <b>Pentaerythritol-13C</b> |
| 27        | Xylose                                          | 204        | 558.9         | Pentaerythritol-13C        |
| <b>28</b> | <b>Levoglucosan</b>                             | <b>204</b> | <b>541.5</b>  | <b>Pentaerythritol-13C</b> |
| 29        | Mannosan                                        | 204        | 536.1         | Pentaerythritol-13C        |
| 30        | Erythritol                                      | 217        | 487.8         | Pentaerythritol-13C        |
| 31        | Arabinitol                                      | 319        | 544.8         | Pentaerythritol-13C        |
| 32        | Mannitol                                        | 319        | 595.1         | Pentaerythritol-13C        |
| 33        | Eicosane ( <i>n</i> -C <sub>20</sub> )          | 57         | 603.0         | Eicosane-d42               |
| 34        | Heneicosane ( <i>n</i> -C <sub>21</sub> )       | 57         | 624.4         | Eicosane-d42               |
| 35        | Docosane ( <i>n</i> -C <sub>22</sub> )          | 57         | 645.4         | Docosane-d46               |
| <b>36</b> | <b>Tricosane (<i>n</i>-C<sub>23</sub>)</b>      | <b>57</b>  | <b>666.1</b>  | <b>Docosane-d46</b>        |
| 37        | Tetracosane ( <i>n</i> -C <sub>24</sub> )       | 57         | 686.6         | Tetracosane-d50            |
| 38        | Pentacosane ( <i>n</i> -C <sub>25</sub> )       | 57         | 707.2         | Tetracosane-d50            |
| 39        | Hexacosane ( <i>n</i> -C <sub>26</sub> )        | 57         | 728.5         | Hexacosane-d54             |
| <b>40</b> | <b>Heptacosane (<i>n</i>-C<sub>27</sub>)</b>    | <b>57</b>  | <b>751.4</b>  | <b>Hexacosane-d54</b>      |
| 41        | Octacosane ( <i>n</i> -C <sub>28</sub> )        | 57         | 776.2         | Octacosane -d58            |
| 42        | Nonacosane ( <i>n</i> -C <sub>29</sub> )        | 57         | 803.5         | Octacosane -d58            |
| 43        | Triacontane ( <i>n</i> -C <sub>30</sub> )       | 57         | 834.0         | Triacontane-d62            |
| <b>44</b> | <b>Hentriacontane (<i>n</i>-C<sub>31</sub>)</b> | <b>57</b>  | <b>868.8</b>  | <b>Triacontane-d62</b>     |
| 45        | Dotriacontane ( <i>n</i> -C <sub>32</sub> )     | 57         | 898.7         | Dotriacontane-d66          |
| 46        | Capric acid                                     | 229        | 469.0         | D C10 acid                 |
| 47        | Undecylic acid                                  | 243        | 497.3         | D C10 acid                 |
| <b>48</b> | <b>Lauric acid</b>                              | <b>257</b> | <b>523.1</b>  | <b>1-Dodecan-d25-ol</b>    |
| 49        | Tridecylic acid                                 | 271        | 547.0         | 1-Dodecan-d25-ol           |
| 50        | Myristic                                        | 285        | 569.8         | 1-Pentadecan-d31-ol        |
| 51        | Pentadecylic acid                               | 299        | 591.8         | 1-Pentadecan-d31-ol        |
| <b>52</b> | <b>Palmitic acid</b>                            | <b>313</b> | <b>613.21</b> | <b>1-Octadecad37-nol</b>   |
| 53        | Stearic acid                                    | 341        | 654.72        | Stearic-d35 acid           |
| 54        | Underivatized palmitic acid                     | 256        | 596.815       | 1-Octadecad37-nol          |
| 55        | Underivatized stearic acid                      | 284        | 639.315       | Stearic-d35 acid           |



|           |                                              |            |                |                         |
|-----------|----------------------------------------------|------------|----------------|-------------------------|
| <b>56</b> | <b>17 alpha (H),28-norhopane (Norhopane)</b> | <b>191</b> | <b>917.9</b>   | <b>D-cholesterol</b>    |
| <b>57</b> | <b>Oleic acid</b>                            | <b>339</b> | <b>650.12</b>  | <b>Stearic-d35 acid</b> |
| 58        | Underivatized oleic acid                     | 264        | 635.314        | Stearic-d35 acid        |
| 59        | Vanillic acid (VA)                           | 297        | 553.2          | 1-Pentadecan-d31-ol     |
| 60        | 3-hydroxybenzoic acid (3-OHBA)               | 267        | 502.5          | 1-Dodecan-d25-ol        |
| 61        | 4-hydroxybenzoic acid (4-OHBA)               | 267        | 519.1          | 1-Dodecan-d25-ol        |
| <b>62</b> | <b>Phthalic acid</b>                         | <b>295</b> | <b>537.612</b> | <b>D phthalic acid</b>  |
| 63        | Isophthalic acid                             | 295        | 551.2          | D phthalic acid         |
| 64        | Terephthalic acid                            | 295        | 559.6          | D phthalic acid         |
| 65        | 2,4-dihydroxybenzoic acid                    | 151        | 424.6          | 1-Dodecan-d25-ol        |
| 66        | Protocatechuic acid                          | 370        | 566.3          | 1-Pentadecan-d31-ol     |
| 67        | Fluoranthene                                 | 202        | 631.6          | D pyrene                |
| <b>68</b> | <b>Pyrene</b>                                | <b>202</b> | <b>644.4</b>   | <b>D pyrene</b>         |
| 69        | Benzo [a] anthracene                         | 228        | 716.8          | D-chrysene              |
| 70        | Chrysene                                     | 228        | 719.3          | D-chrysene              |
| 71        | Benzo [e] pyrene                             | 252        | 819.8          | D-perylene              |
| 72        | Benzo [a] pyrene                             | 252        | 824.1          | D-perylene              |
| 73        | Benzo [b] fluoranthene                       | 252        | 796.2          | D-perylene              |
| 74        | Benzo [k] fluoranthene                       | 252        | 797.8          | D-perylene              |

**Table S3.** Mean levels of PM<sub>1</sub> compositions and trace gases by air mass origins.

| Species                                            | Marine air without troughs | Marine air with troughs | Continental air | Coastal air |
|----------------------------------------------------|----------------------------|-------------------------|-----------------|-------------|
| CO (ppb)                                           | 264±12                     | 290±24                  | 436±49          | 318±18      |
| O <sub>3</sub> (ppb)                               | 4.4±0.5                    | 4.6±1.0                 | 30.9±7.3        | 26.2±4.2    |
| SO <sub>2</sub> (ppb)                              | 2.1±0.1                    | 2.5±0.2                 | 1.8±0.1         | 1.7±0.1     |
| NO (ppb)                                           | 12.7±2.2                   | 19.2±5.0                | 2.2±2.1         | 1.0±1.5     |
| NO <sub>2</sub> (ppb)                              | 20.2±1.5                   | 27.3±2.9                | 28.6±7.3        | 15.5±3.1    |
| NO <sub>x</sub> (ppb)                              | 32.9±3.5                   | 46.5±7.5                | 30.8±8.1        | 16.5±4.4    |
| O <sub>x</sub> (ppb)                               | 26.4±1.6                   | 33.6±2.3                | 59.6±12.3       | 41.7±3.1    |
| PM <sub>1</sub> -OM (µg/m <sup>3</sup> )           | 3.2±0.3                    | 5.0±0.6                 | 11.1±2.9        | 7.0±1.3     |
| NO <sub>3</sub> <sup>-</sup> (µg/m <sup>3</sup> )  | 0.2±0.0                    | 0.4±0.1                 | 1.2±0.6         | 0.6±0.1     |
| SO <sub>4</sub> <sup>2-</sup> (µg/m <sup>3</sup> ) | 2.2±0.2                    | 2.3±0.5                 | 4.7±0.6         | 6.6±1.1     |
| NH <sub>4</sub> <sup>+</sup> (µg/m <sup>3</sup> )  | 0.8±0.1                    | 0.9±0.2                 | 1.9±0.2         | 2.5±0.4     |

**Table S4.** Values of R<sup>2</sup>, slope, and intercept for the linear regressions between the simulations and observations.

| Species             | Intercept | Slope | Standard error | R <sup>2</sup> | p value |
|---------------------|-----------|-------|----------------|----------------|---------|
| PM <sub>1</sub> -OM | 0.68      | 0.76  | 1.08           | 0.86           | 0.106   |
| MA                  | 0.23      | 0.92  | 1.12           | 0.94           | 0.007   |

---

|                   |       |      |      |      |       |
|-------------------|-------|------|------|------|-------|
| CMA               | 0.04  | 0.86 | 0.07 | 0.93 | 0.040 |
| 2-HGA             | 0.04  | 0.92 | 0.27 | 0.94 | 0.000 |
| 2-MT1             | 0.01  | 0.93 | 0.69 | 0.89 | 0.000 |
| <i>cis</i> -2-MBT | 0.23  | 0.75 | 0.43 | 0.98 | 0.002 |
| Levogluconan      | -0.12 | 1.02 | 0.70 | 1.00 | 0.000 |
| Fructose-2        | 0.04  | 0.65 | 0.05 | 0.84 | 0.021 |
| Palmitic acid     | 0.11  | 0.92 | 0.65 | 0.92 | 0.107 |
| Norhopane         | 0.74  | 0.75 | 4.13 | 0.76 | 0.000 |
| Oleic acid        | 0.42  | 0.77 | 1.15 | 0.86 | 0.078 |
| DHOPA             | 0.01  | 0.74 | 0.03 | 0.79 | 0.000 |
| Phthalic acid     | 0.00  | 1.00 | 0.02 | 1.00 | 0.649 |
| 2-MGA             | 0.02  | 0.57 | 0.03 | 0.66 | 0.000 |

---
